# Supplementary material for: Palladium-catalyzed carbonylative coupling of aryl iodides with an organocopper reagent: a straightforward procedure for the synthesis of aryl trifluoromethyl ketones
Source: Royal Society of Chemistry journal article supplement (doi:10.1039/c6ra12287f), 2016-01-01

## Supporting Information

|                                                    |               |
|----------------------------------------------------|---------------|
| <b>1: General information</b>                      | <b>S2</b>     |
| <b>2: Characterization results of the products</b> | <b>S2-S4</b>  |
| <b>3: NMR Spectra</b>                              | <b>S5-S18</b> |

**1: General information:** Unless otherwise stated, reactions were run under an argon atmosphere with exclusion of moisture from reagents and glassware using standard techniques for manipulating air-sensitive compounds. NMR spectra were recorded on Varian Mercury 400 (400 MHz) spectrophotometers. All chemical shift ( $\delta$ ) are reported in ppm and coupling constants ( $J$ ) in Hz; All chemical shifts are relative to solvent peaks [chloroform: 7.26 ( $^1\text{H}$ ), 77.00 ( $^{13}\text{C}$ ); methanol: 3.31 ( $^1\text{H}$ ), 48.80 ( $^{13}\text{C}$ )], respectively. Mass spectra were measured on a MS spectrometer.

**Reagents:** Unless otherwise statement, commercial reagents were used without purification.

## 2: Characterization results of the products

A 30 mL autoclave was charged with Aryl iodides (0.2 mmol),  $(\text{PPh}_3)_3\text{CuCF}_3$  (0.3 mmol),  $(\text{PPh}_3)_2\text{PdI}_2$  (0.01 mmol), xylene (5 mL) and a magnetic stirring bar. Once sealed, the autoclave was purged 3 times with CO, then pressurized to 20 bar and heated at 70 °C for 24h. After reaction, the autoclave was cooled to room temperature and depressurized. An additional of methyl iodide (0.5 mL) was added and reacted for a further 2 hs. The mixture was then filtered through celite using EtOAc and the solvent was removed under reduced pressure and the residue was purified by column chromatography on silica gel to give the corresponding compound.

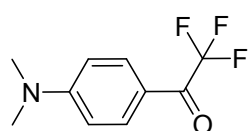

petroleum ether/EtOAc=5/1 as eluant. **Yield:** 75% , pale yellow soild.  $^1\text{H NMR}$  (400 MHz,  $\text{CDCl}_3$ ):  $\delta$  7.96 (d,  $J = 8.4$  Hz, 2H), 6.68 (d,  $J = 9.2$  Hz, 2H), 3.10 (s, 6H);  $^{13}\text{C NMR}$  (101 MHz,  $\text{CDCl}_3$ ):  $\delta$  177.81 (q,  $J = 34.3$  Hz), 154.62, 132.68, 117.45(q,  $J = 292.9$  Hz), 117.17, 110.58, 39.76;  $^{19}\text{F}\{^1\text{H}\}$  NMR (376 MHz,  $\text{CDCl}_3$ ):  $\delta$  -71.03; HRMS-EI (m/z): Calcd for  $\text{C}_{10}\text{H}_{10}\text{F}_3\text{NO}$ , 217.0714. Found: 217.0715.

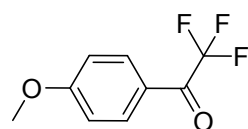

petroleum ether/ $\text{CH}_2\text{Cl}_2$ =2/1. **Yield:** 96% , colourless oil.  $^1\text{H NMR}$  (400 MHz,  $\text{CDCl}_3$ ):  $\delta$  8.06 (d,  $J = 8.4$  Hz, 2H), 7.00 (d,  $J = 9.0$  Hz, 2H), 3.93 (s, 3H);  $^{13}\text{C NMR}$  (101 MHz,  $\text{CDCl}_3$ ):  $\delta$  178.88 (q,  $J = 34.3$  Hz),

165.18, 132.73, 122.68, 116.85 (q,  $J = 292.9$  Hz), 55.61;  $^{19}\text{F}$  NMR (376 MHz,  $\text{CDCl}_3$ ):  $\delta$  -71.81; **HRMS-EI** ( $m/z$ ): Calcd for  $\text{C}_9\text{H}_7\text{F}_3\text{O}_2$ , 204.0398. Found: 204.0402

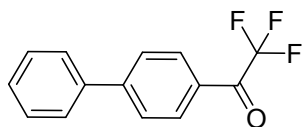

petroleum ether/ $\text{CH}_2\text{Cl}_2=2/1$ . **Yield:** 78%, white soild.  $^1\text{H}$  NMR (400 MHz,  $\text{CDCl}_3$ ):  $\delta$  8.16 (d,  $J = 8.3$  Hz, 2H), 7.77 (d,  $J = 8.4$  Hz, 2H), 7.65 (d,  $J = 7.4$  Hz, 2H), 7.51 (t,  $J = 7.4$  Hz, 2H), 7.44 (s, 1H);

$^{13}\text{C}$  NMR (101 MHz,  $\text{CDCl}_3$ ):  $\delta$  180.03 (q,  $J = 34.3$  Hz), 148.16, 139.04, 130.72, 129.08, 128.87, 128.45, 127.59, 127.31, 116.7 (q,  $J = 292.9$  Hz);  $^{19}\text{F}$  NMR (376 MHz,  $\text{CDCl}_3$ ):  $\delta$  -71.73; **HRMS-EI** ( $m/z$ ): Calcd for  $\text{C}_{14}\text{H}_9\text{F}_3\text{O}$ , 250.0605. Found: 250.0608.

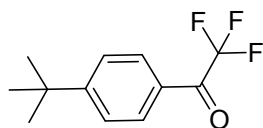

petroleum ether/ $\text{CH}_2\text{Cl}_2=2/1$ . **Yield:** 80%, colourless oil.  $^1\text{H}$  NMR (400 MHz,  $\text{CDCl}_3$ ):  $\delta$  8.02 (d,  $J = 8.2$  Hz, 2H), 7.56 (d,  $J = 8.5$  Hz, 2H), 1.36 (s, 9H);  $^{13}\text{C}$  NMR (101 MHz,  $\text{CDCl}_3$ ):  $\delta$  180.06 (q,  $J = 34.3$  Hz),

159.79, 130.13, 127.20, 126.19, 121.07, 116.73 (q,  $J = 292.2$  Hz), 35.31, 30.70;  $^{19}\text{F}$  NMR (376 MHz,  $\text{CDCl}_3$ ):  $\delta$  -72.17; **HRMS-EI** ( $m/z$ ): Calcd for  $\text{C}_{12}\text{H}_{13}\text{F}_3\text{O}$ , 230.0918. Found: 230.0916.

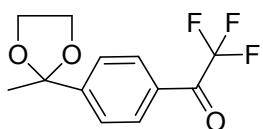

petroleum ether/ $\text{CH}_2\text{Cl}_2=2/1$ . **Yield:** 77%, pale yellow oil.  $^1\text{H}$  NMR (400 MHz,  $\text{CDCl}_3$ ):  $\delta$  8.06 (d,  $J = 8.1$  Hz, 2H), 7.67 (d,  $J = 8.4$  Hz, 2H), 4.07 (t,  $J = 7.0$  Hz, 2H), 3.76 (t,  $J = 6.9$  Hz, 2H), 1.65 (s, 3H);  $^{13}\text{C}$

NMR (101 MHz,  $\text{CDCl}_3$ ):  $\delta$  180.1 (q,  $J = 34.3$  Hz), 151.36, 130.25, 129.37, 126.10, 116.6 (q,  $J = 292.2$  Hz), 108.21, 64.65, 27.27;  $^{19}\text{F}$  NMR (376 MHz,  $\text{CDCl}_3$ ):  $\delta$  -71.98; **HRMS-EI** ( $m/z$ ): Calcd for  $\text{C}_{12}\text{H}_{11}\text{F}_3\text{O}_3$ , 260.0660. Found: 260.0660.

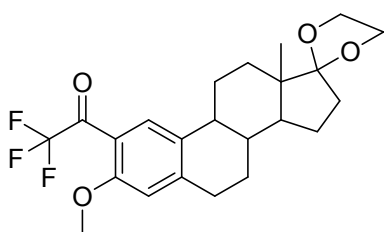

petroleum ether/ $\text{EtOAc}=5/1$ . **Yield:** 45%, white soild.  $^1\text{H}$  NMR (400 MHz,  $\text{CDCl}_3$ ):  $\delta$  7.62 (s, 1H), 6.71 (s, 1H), 4.18-3.72 (m, 7H), 2.46-1.10 (m, 15H), 0.87 (s, 3H);  $^{13}\text{C}$  NMR (101 MHz,  $\text{CDCl}_3$ ):  $\delta$  181.85 (q,  $J = 36.4$  Hz), 157.83, 146.55, 133.22, 128.75, 119.20, 116.37 (q,  $J = 292.2$  Hz),

112.16, 65.24, 64.57, 55.82, 49.17, 46.02, 43.17, 38.66, 34.15, 30.43, 30.28, 26.50, 25.84, 22.26, 14.22;  $^{19}\text{F}$  NMR (376 MHz,  $\text{CDCl}_3$ ):  $\delta$  -74.38; HRMS-EI (m/z): Calcd for  $\text{C}_{23}\text{H}_{27}\text{F}_3\text{O}_4$ , 424.1861. Found: 424.1858

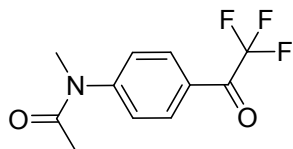

petroleum ether/EtOAc=1/2. Yield: 78%, white solid.  $^1\text{H}$  NMR (400 MHz,  $\text{CD}_3\text{COD}$ ):  $\delta$  9.13 (d,  $J$  = 8.2 Hz, 2H), 8.81 (d,  $J$  = 8.4 Hz, 2H), 6.31 (s, 3H), 4.78 (s, 3H);  $^{13}\text{C}$  NMR (101 MHz,  $\text{CD}_3\text{COD}$ ):  $\delta$  172.84, 146.58, 136.07, 130.98, 124.31(q,  $J$  = 287.9 Hz), 97.67(q,  $J$  = 34.0 Hz), 37.54, 22.35;  $^{19}\text{F}$  NMR (376 MHz,  $\text{CD}_3\text{COD}$ ):  $\delta$  -84.83; HRMS-EI (m/z): Calcd for  $\text{C}_{11}\text{H}_{10}\text{F}_3\text{NO}_2$ , 245.0664. Found: 245.0664.

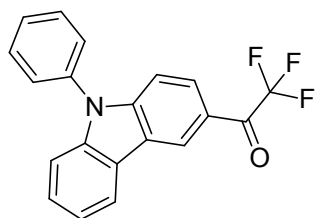

petroleum ether/EtOAc=5/1. Yield: 86%, white solid.  $^1\text{H}$  NMR (400 MHz,  $\text{CDCl}_3$ ):  $\delta$  8.90 (s, 1H), 8.23 (d,  $J$  = 8.6 Hz, 1H), 8.14 (d,  $J$  = 8.7 Hz, 1H), 7.71-7.61 (m, 2H), 7.55 (t,  $J$  = 6.5 Hz, 3H), 7.48 (d,  $J$  = 8.7 Hz, 1H), 7.42 (t,  $J$  = 8.2 Hz, 3H);  $^{13}\text{C}$  NMR (101 MHz,  $\text{CDCl}_3$ ):  $\delta$  179.63 (q,  $J$  = 36.4 Hz), 144.64, 141.86, 136.22, 130.15, 128.51, 128.10, 127.30, 126.99, 124.04, 123.48, 123.02, 121.84, 120.70, 117.21(q,  $J$  = 292.9 Hz), 110.51, 110.09;  $^{19}\text{F}$  NMR (376 MHz,  $\text{CDCl}_3$ ):  $\delta$  -70.37; HRMS-EI (m/z): Calcd for  $\text{C}_{20}\text{H}_{12}\text{F}_3\text{NO}$ , 339.0871. Found: 339.0873.

#### 4: NMR Spectra

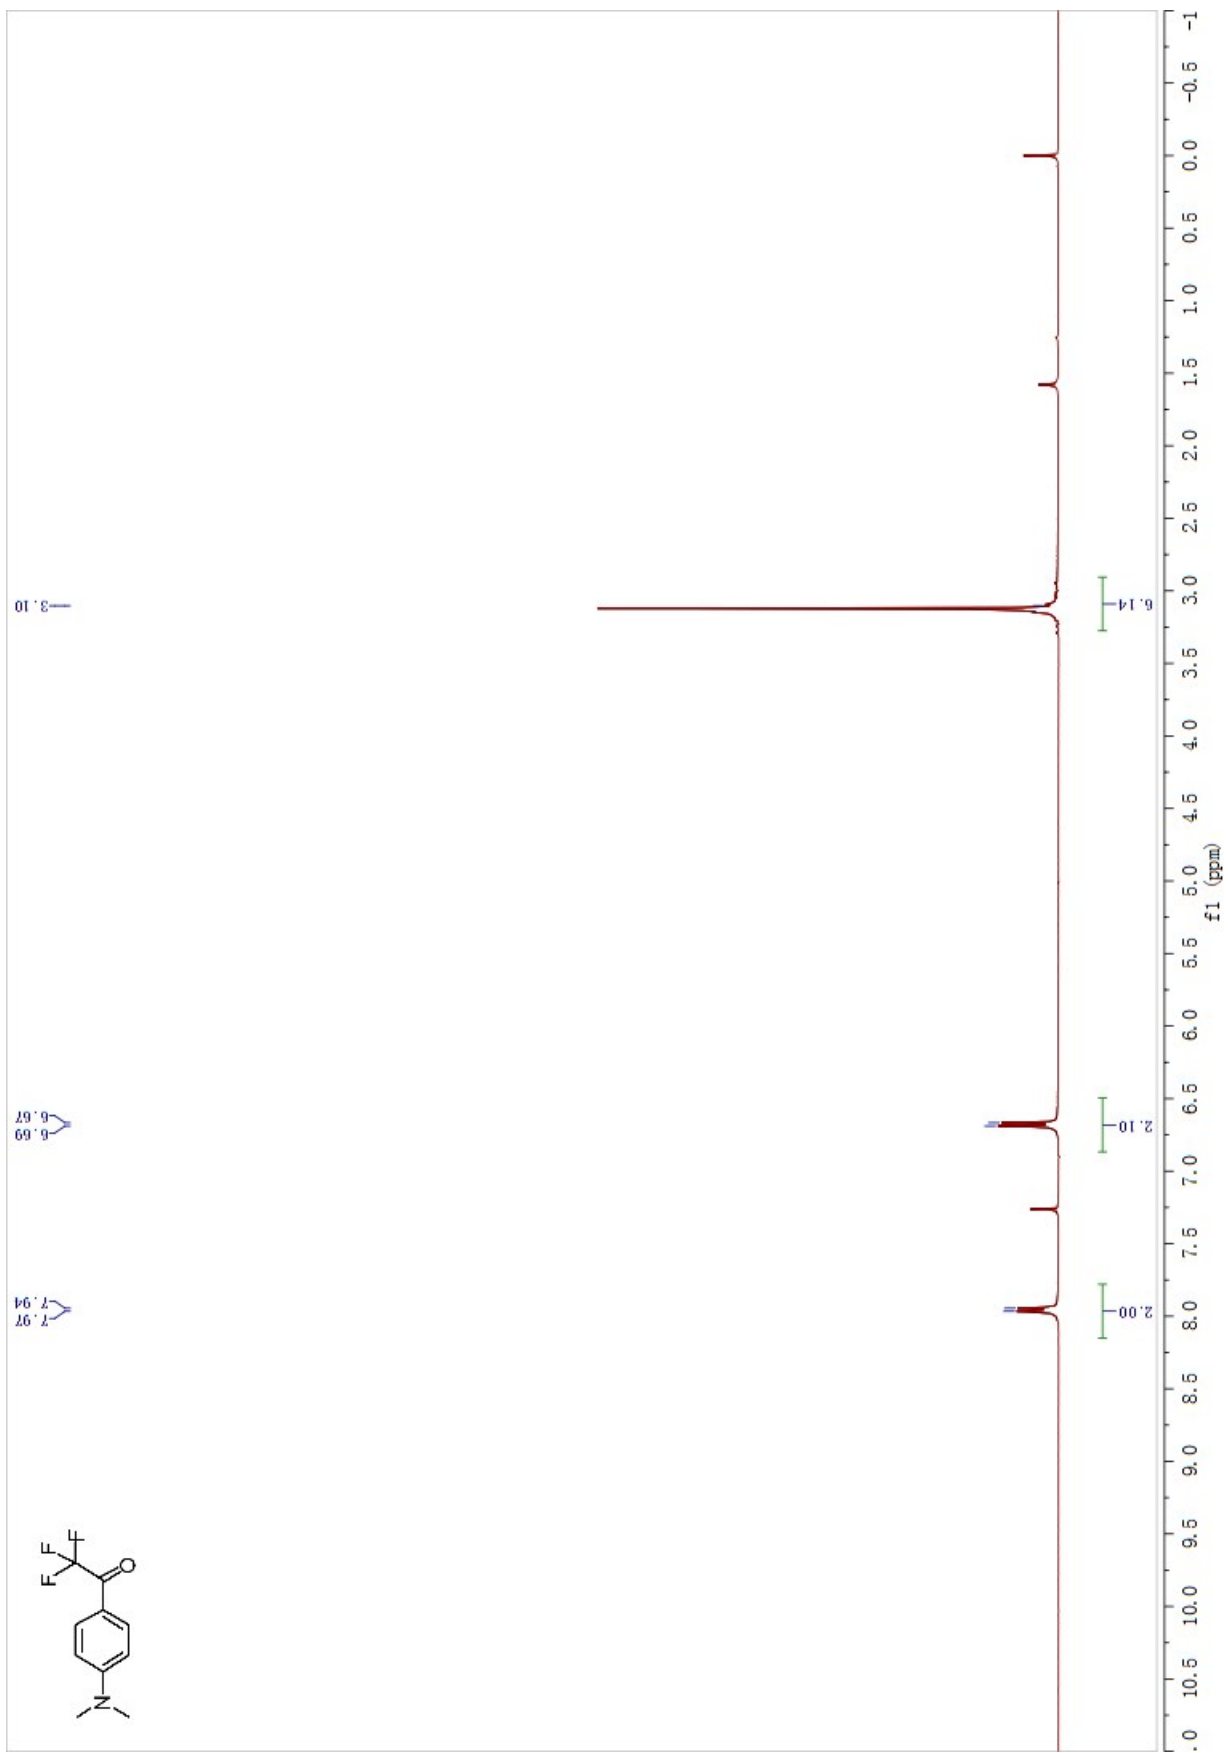

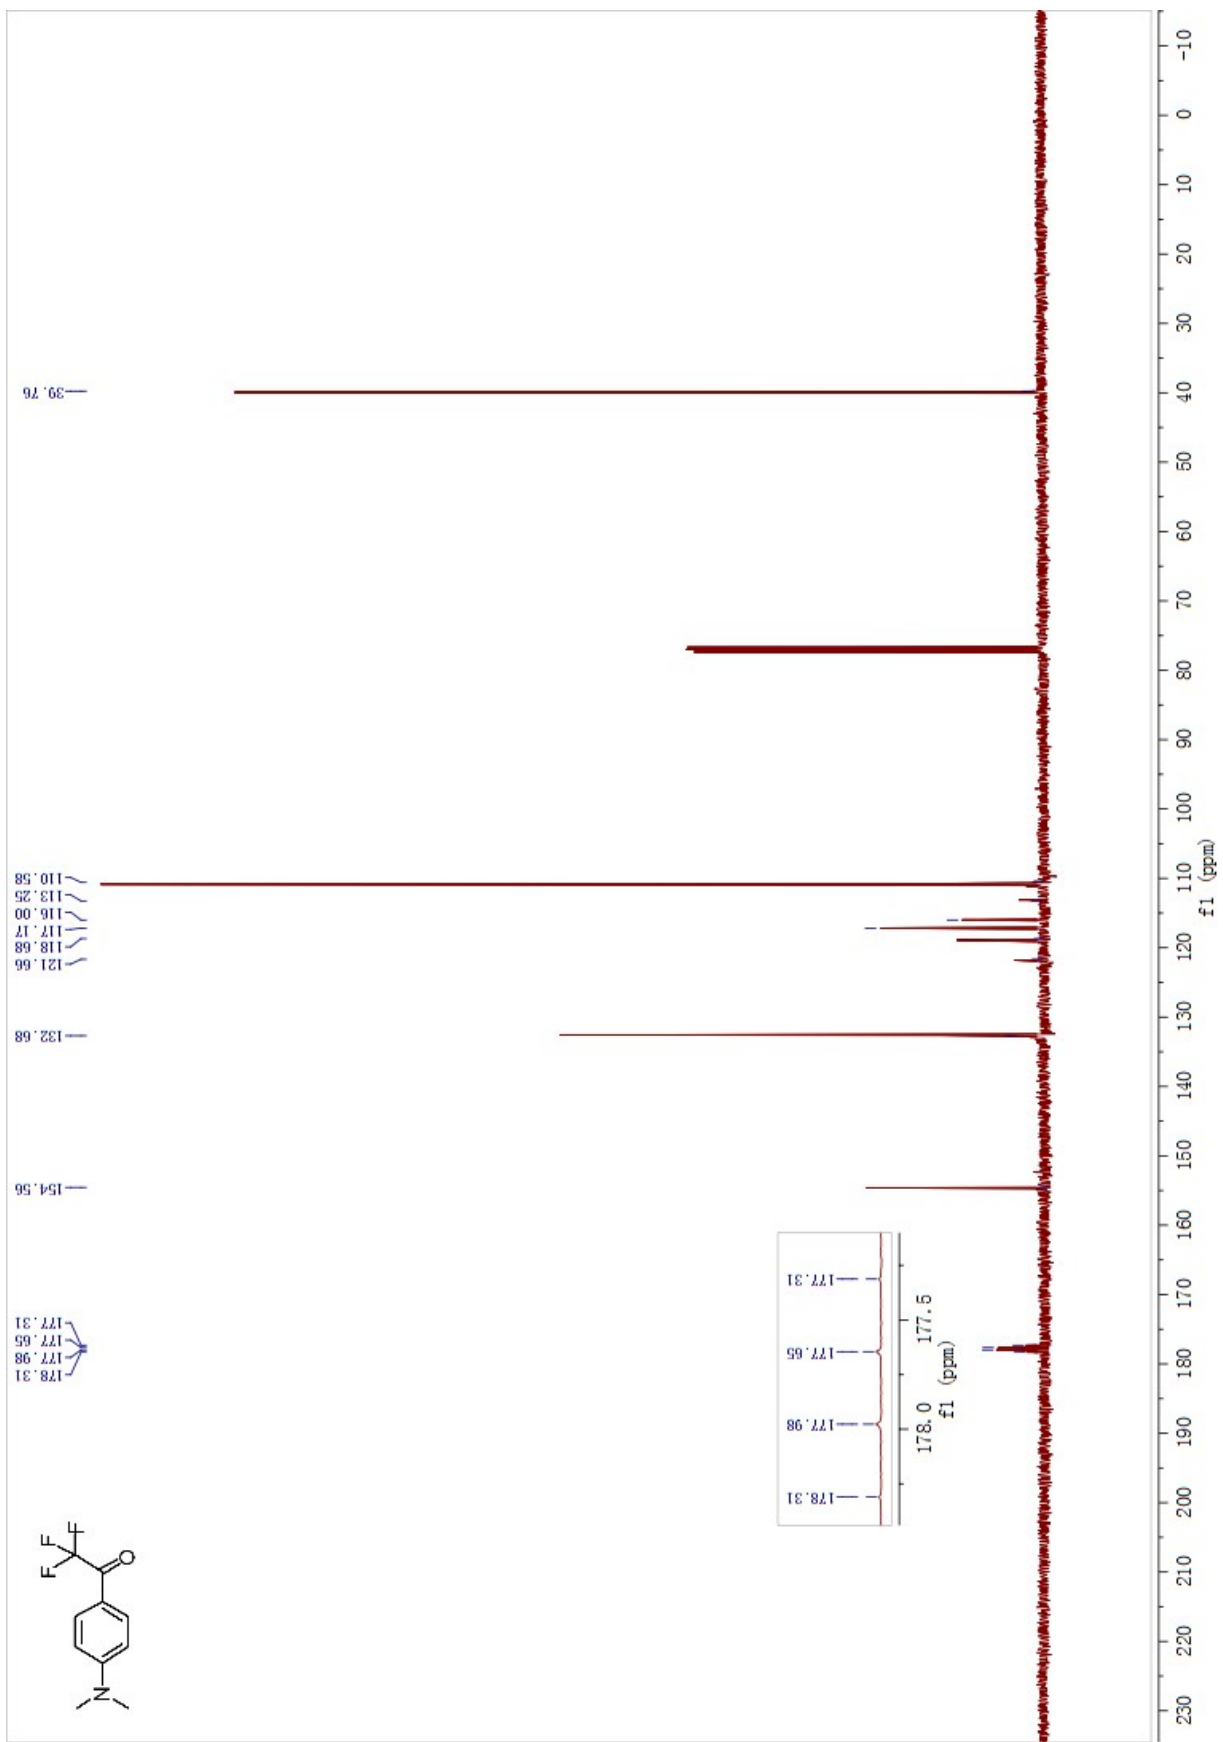

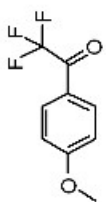

8.07  
8.05

7.01  
6.99

3.93

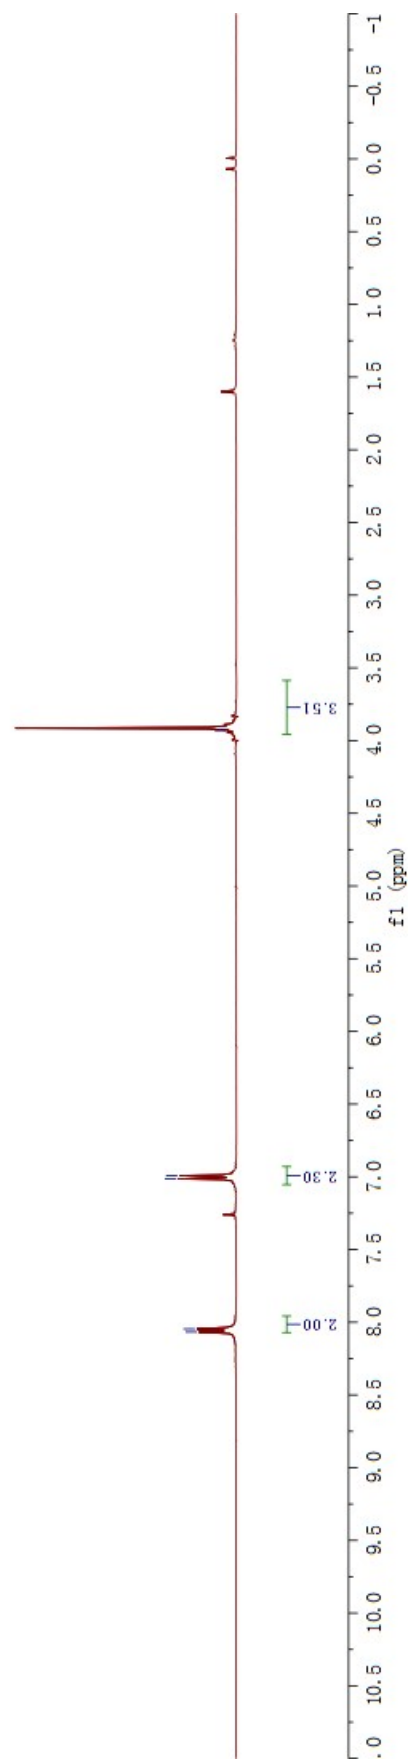

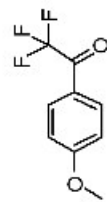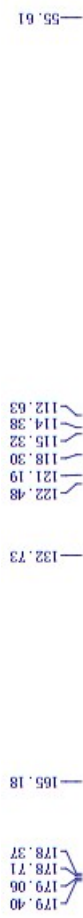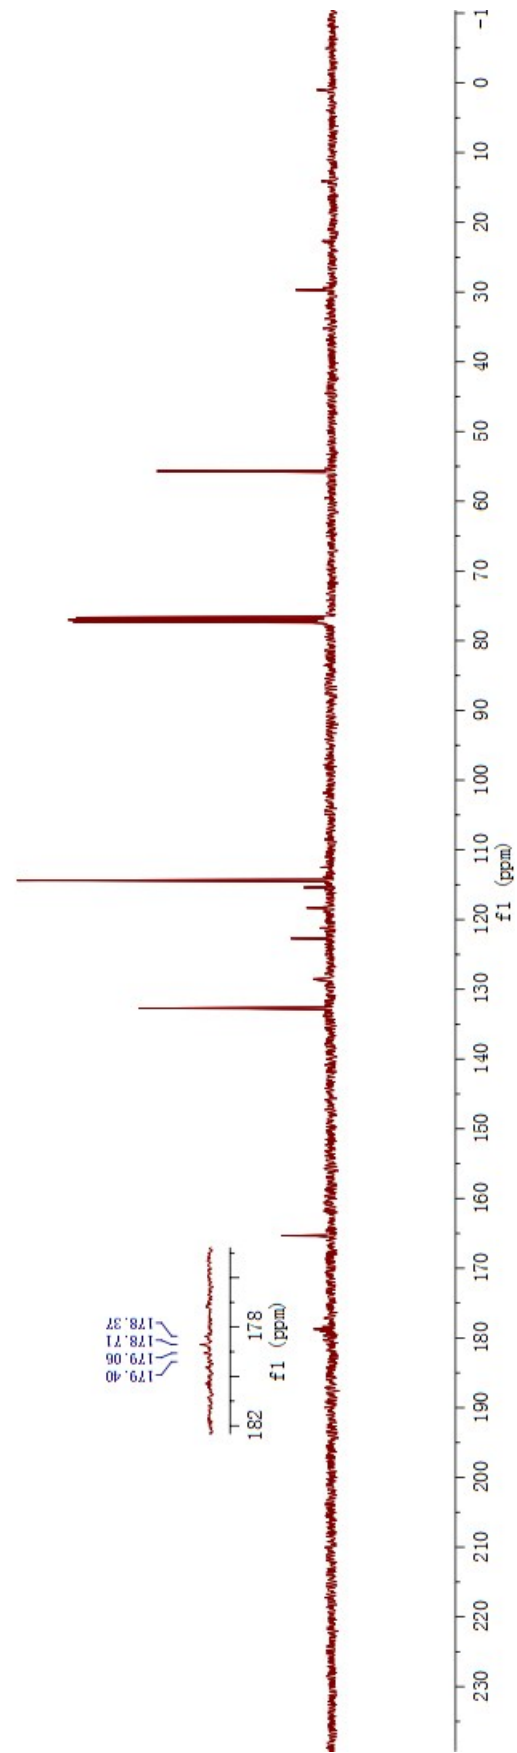



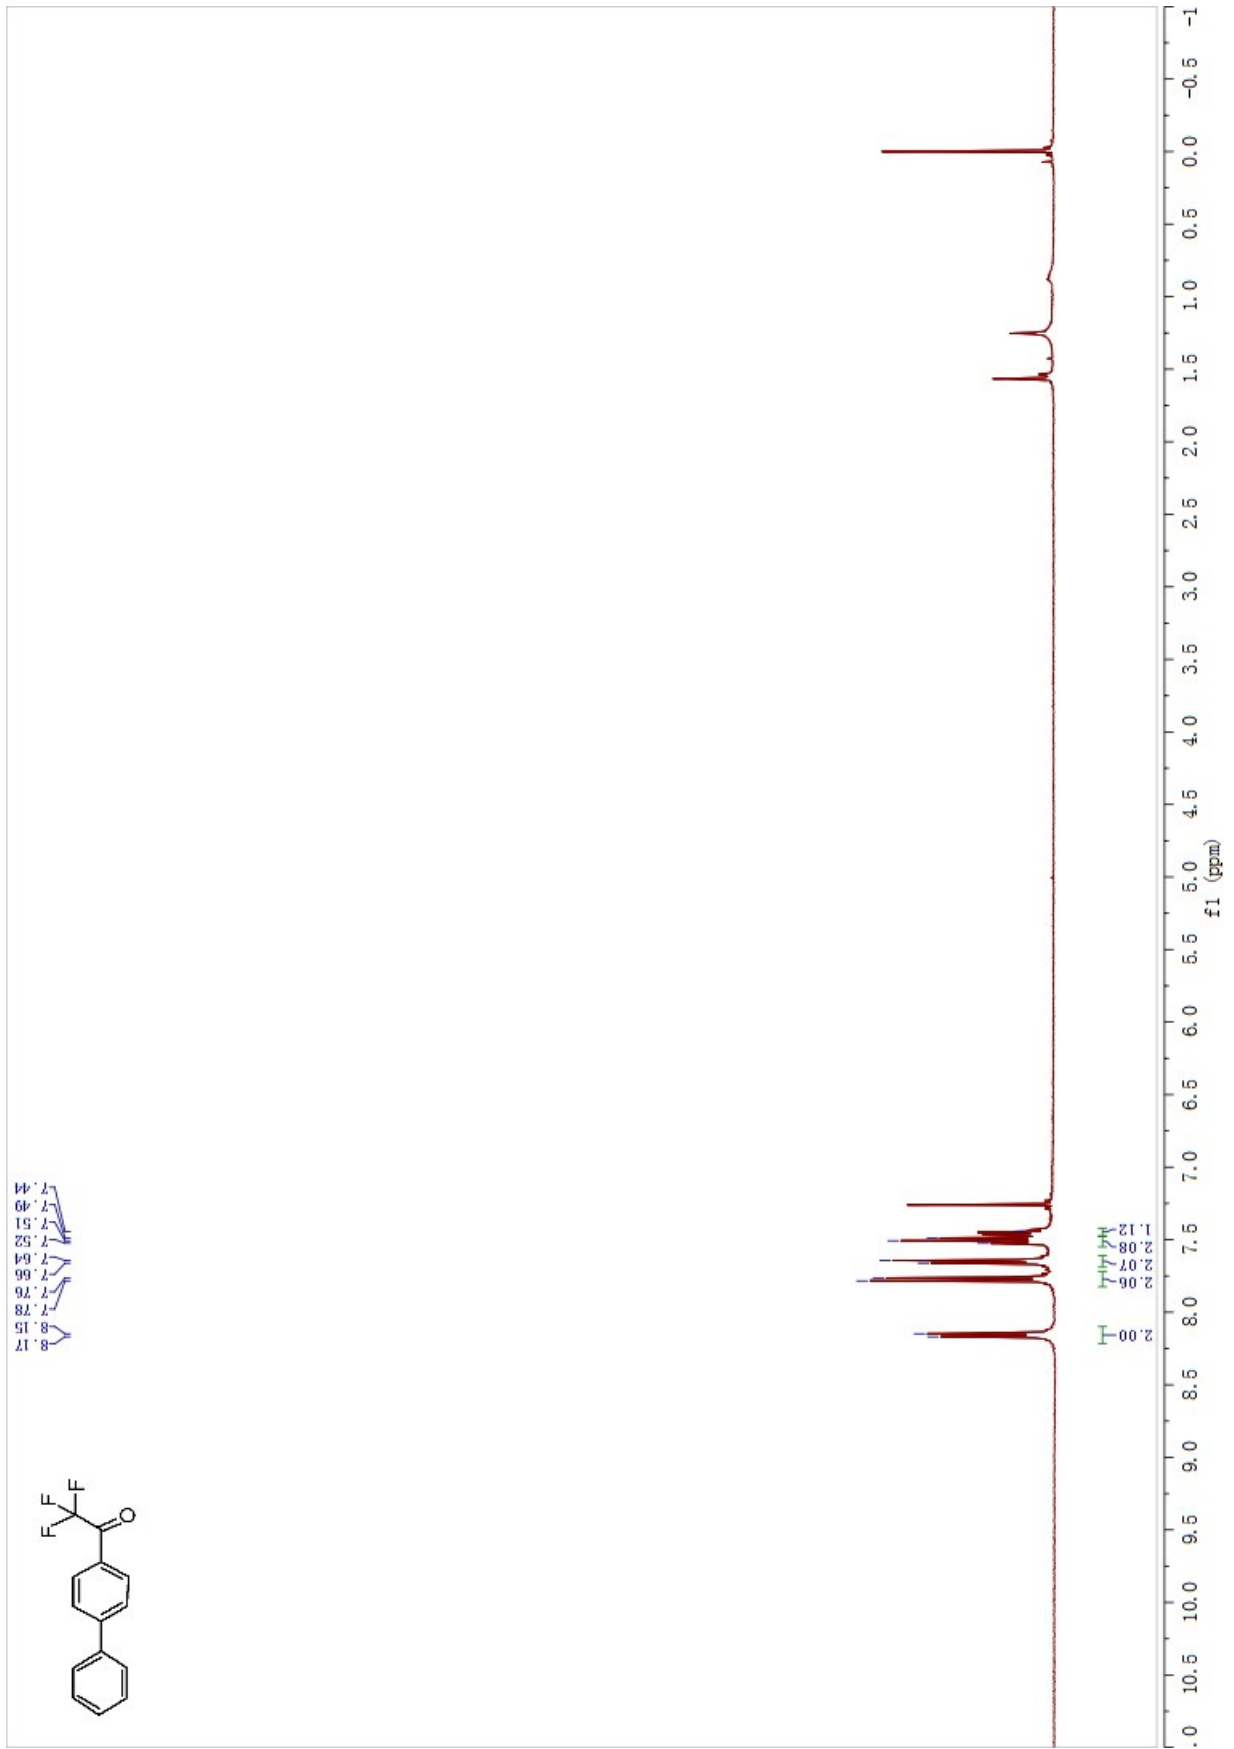

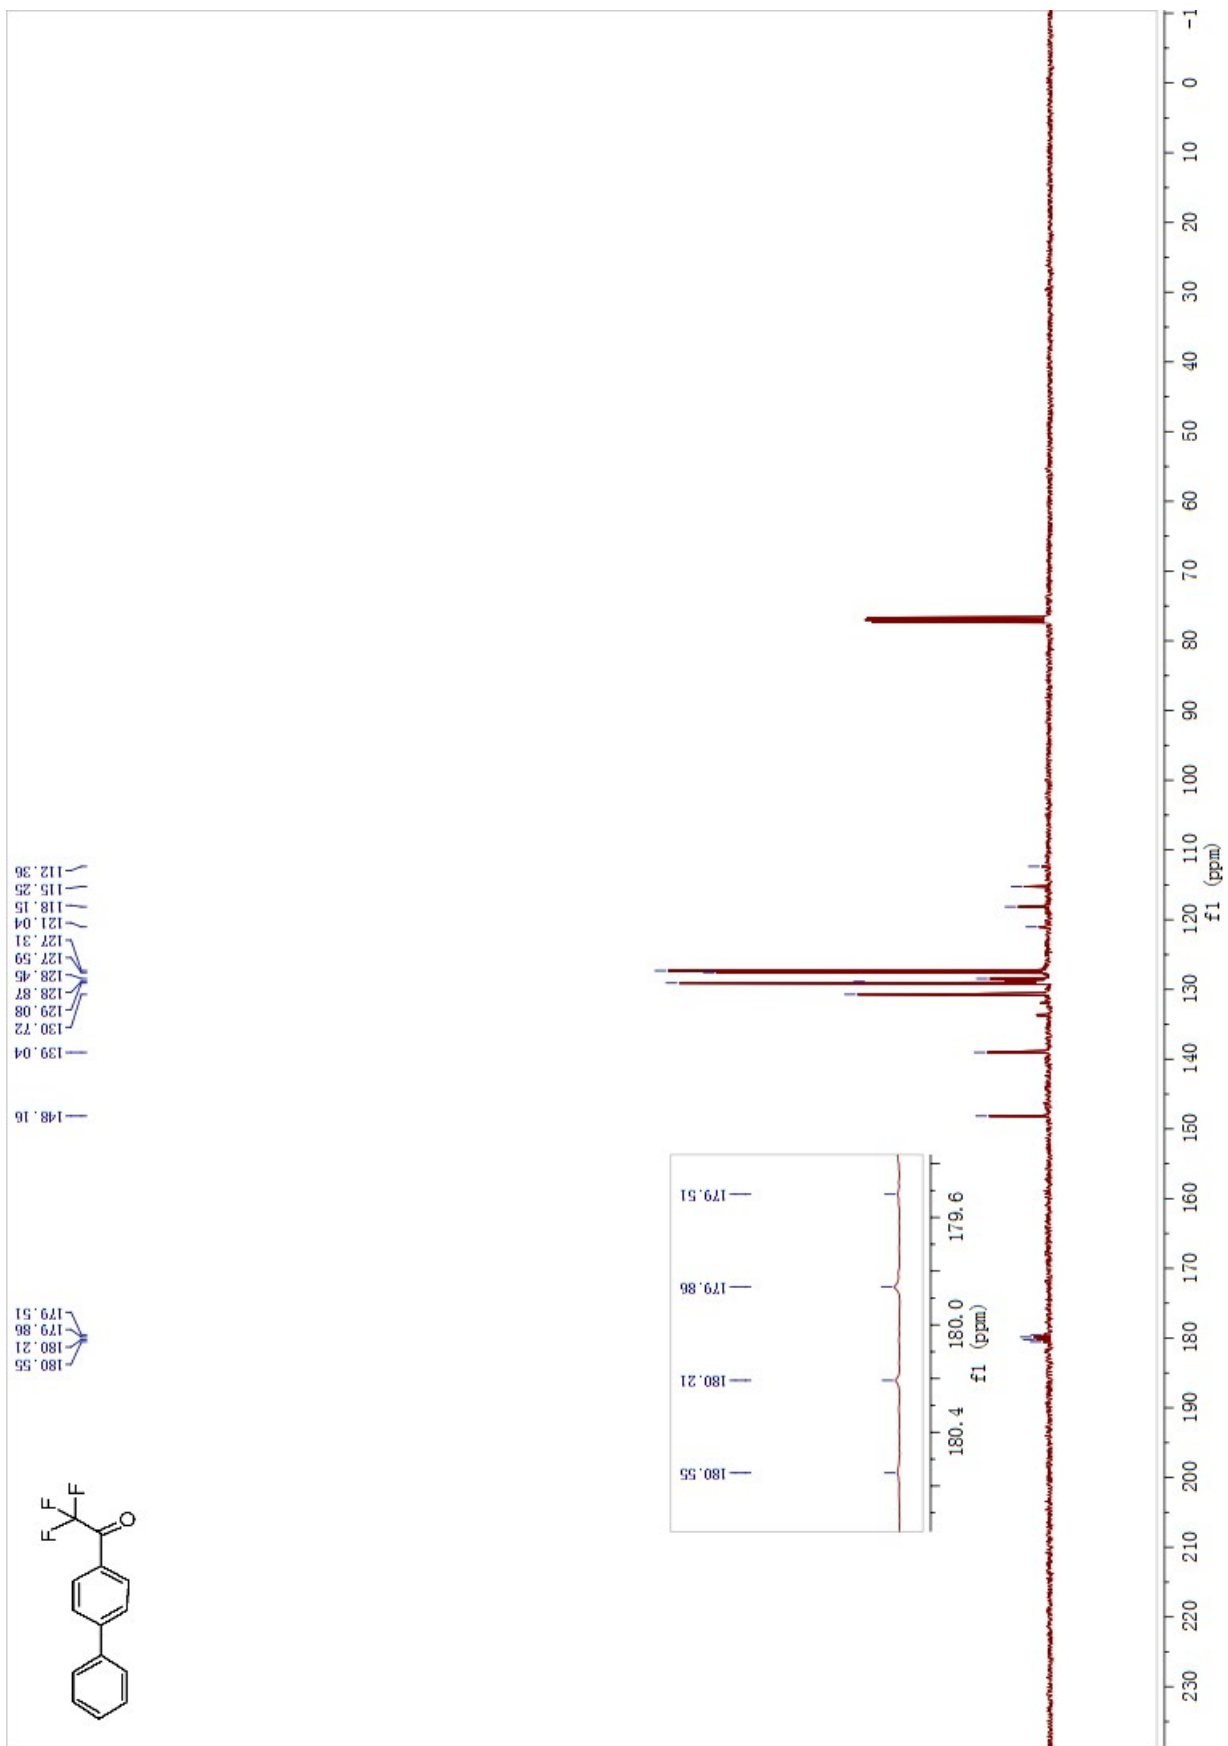

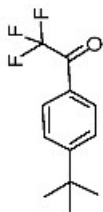

8.03  
8.01  
7.58  
7.55  
7.26

1.36

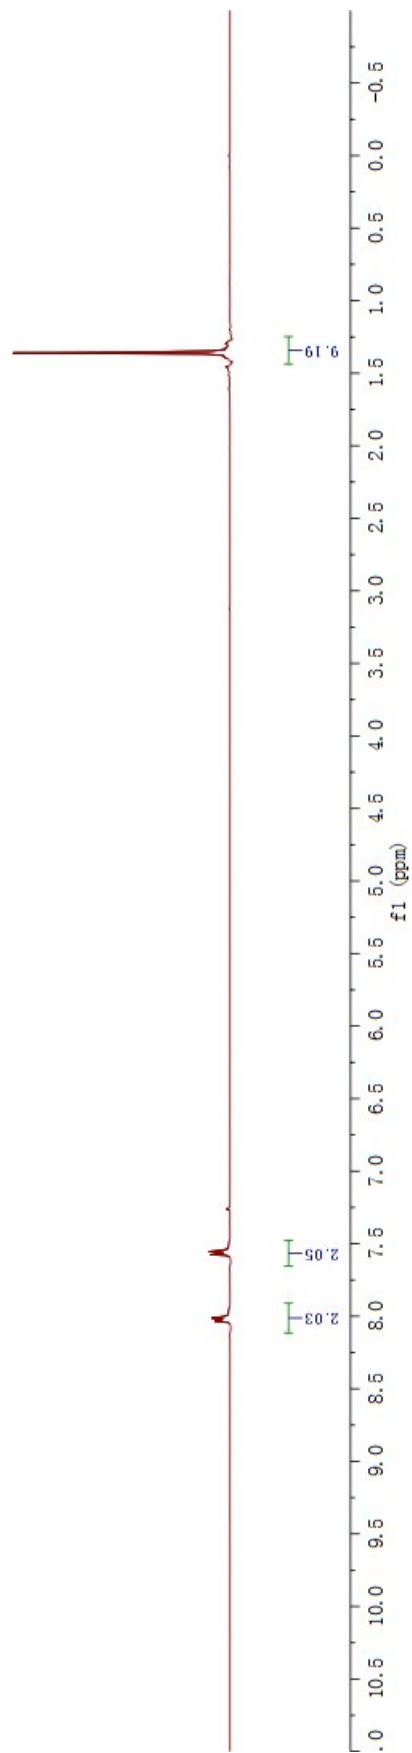

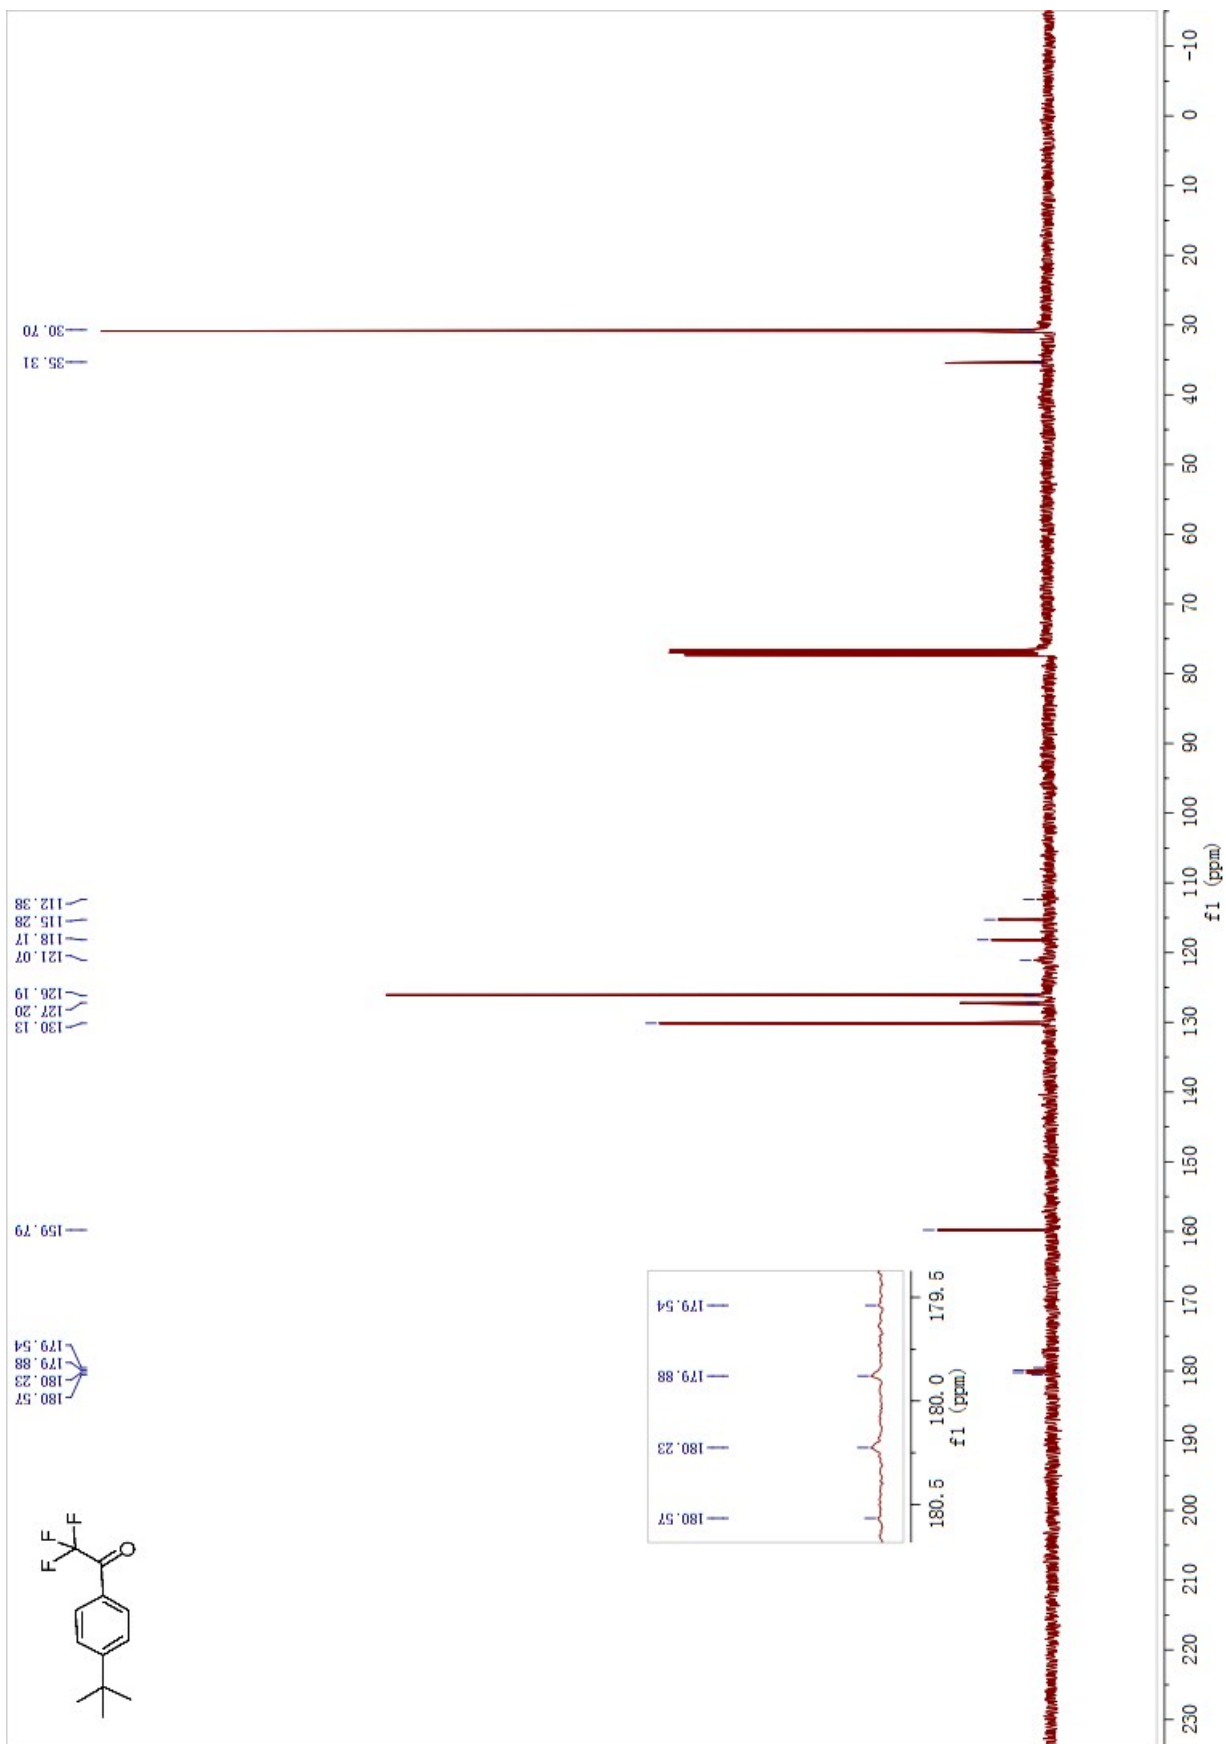

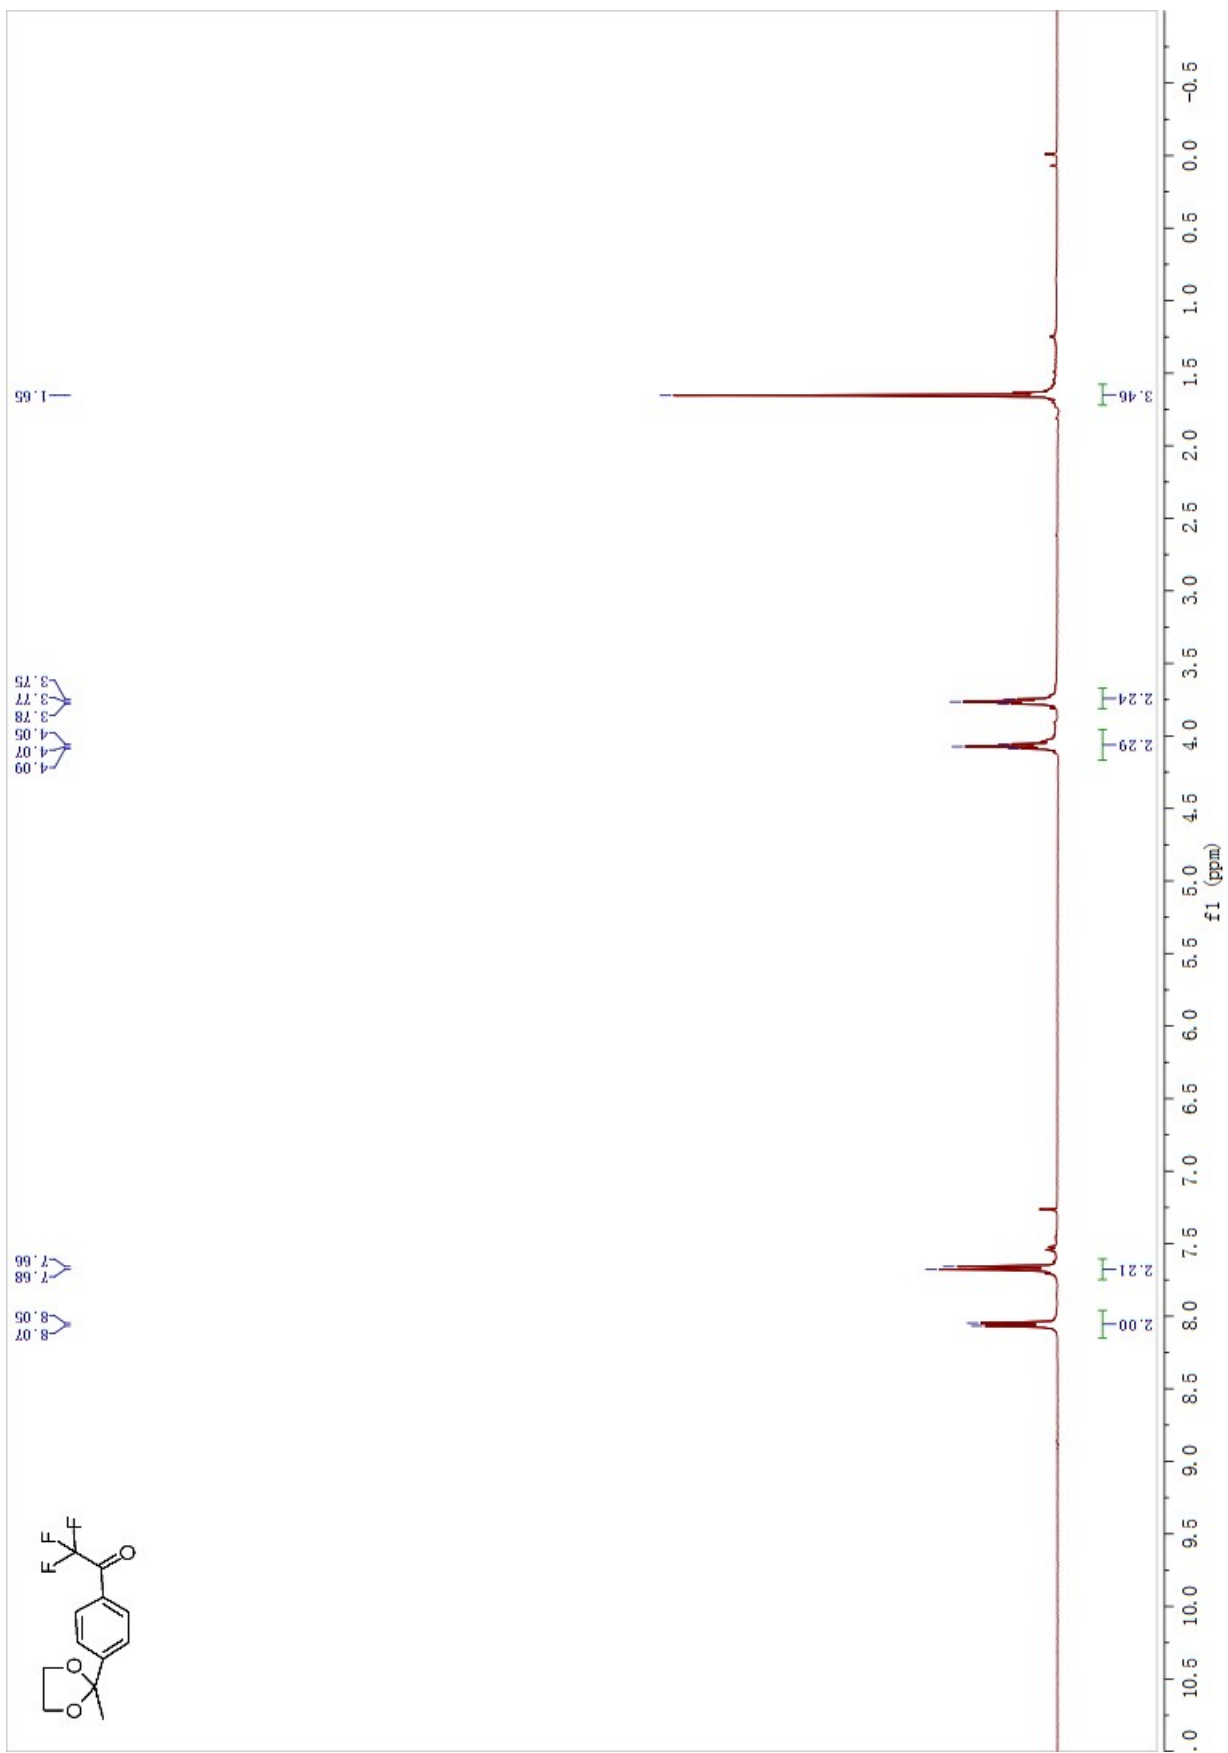

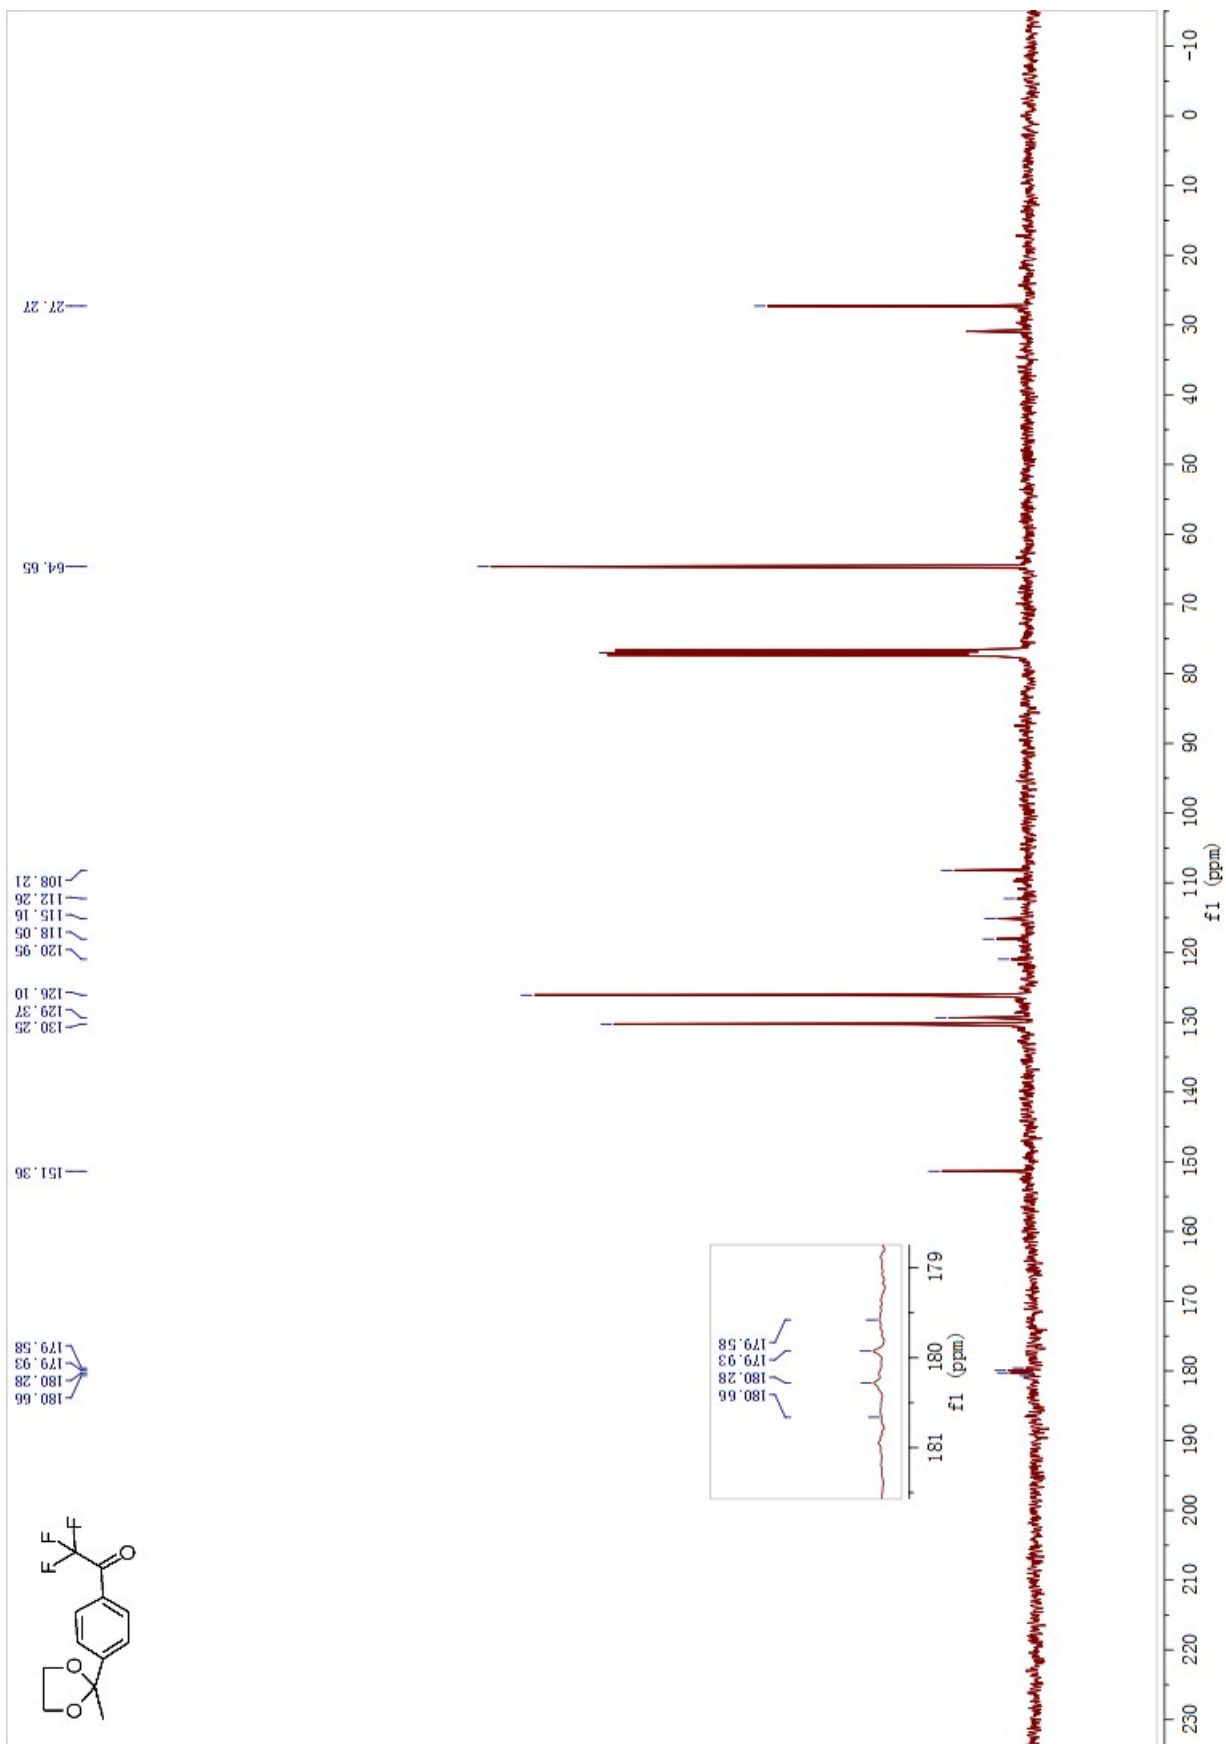

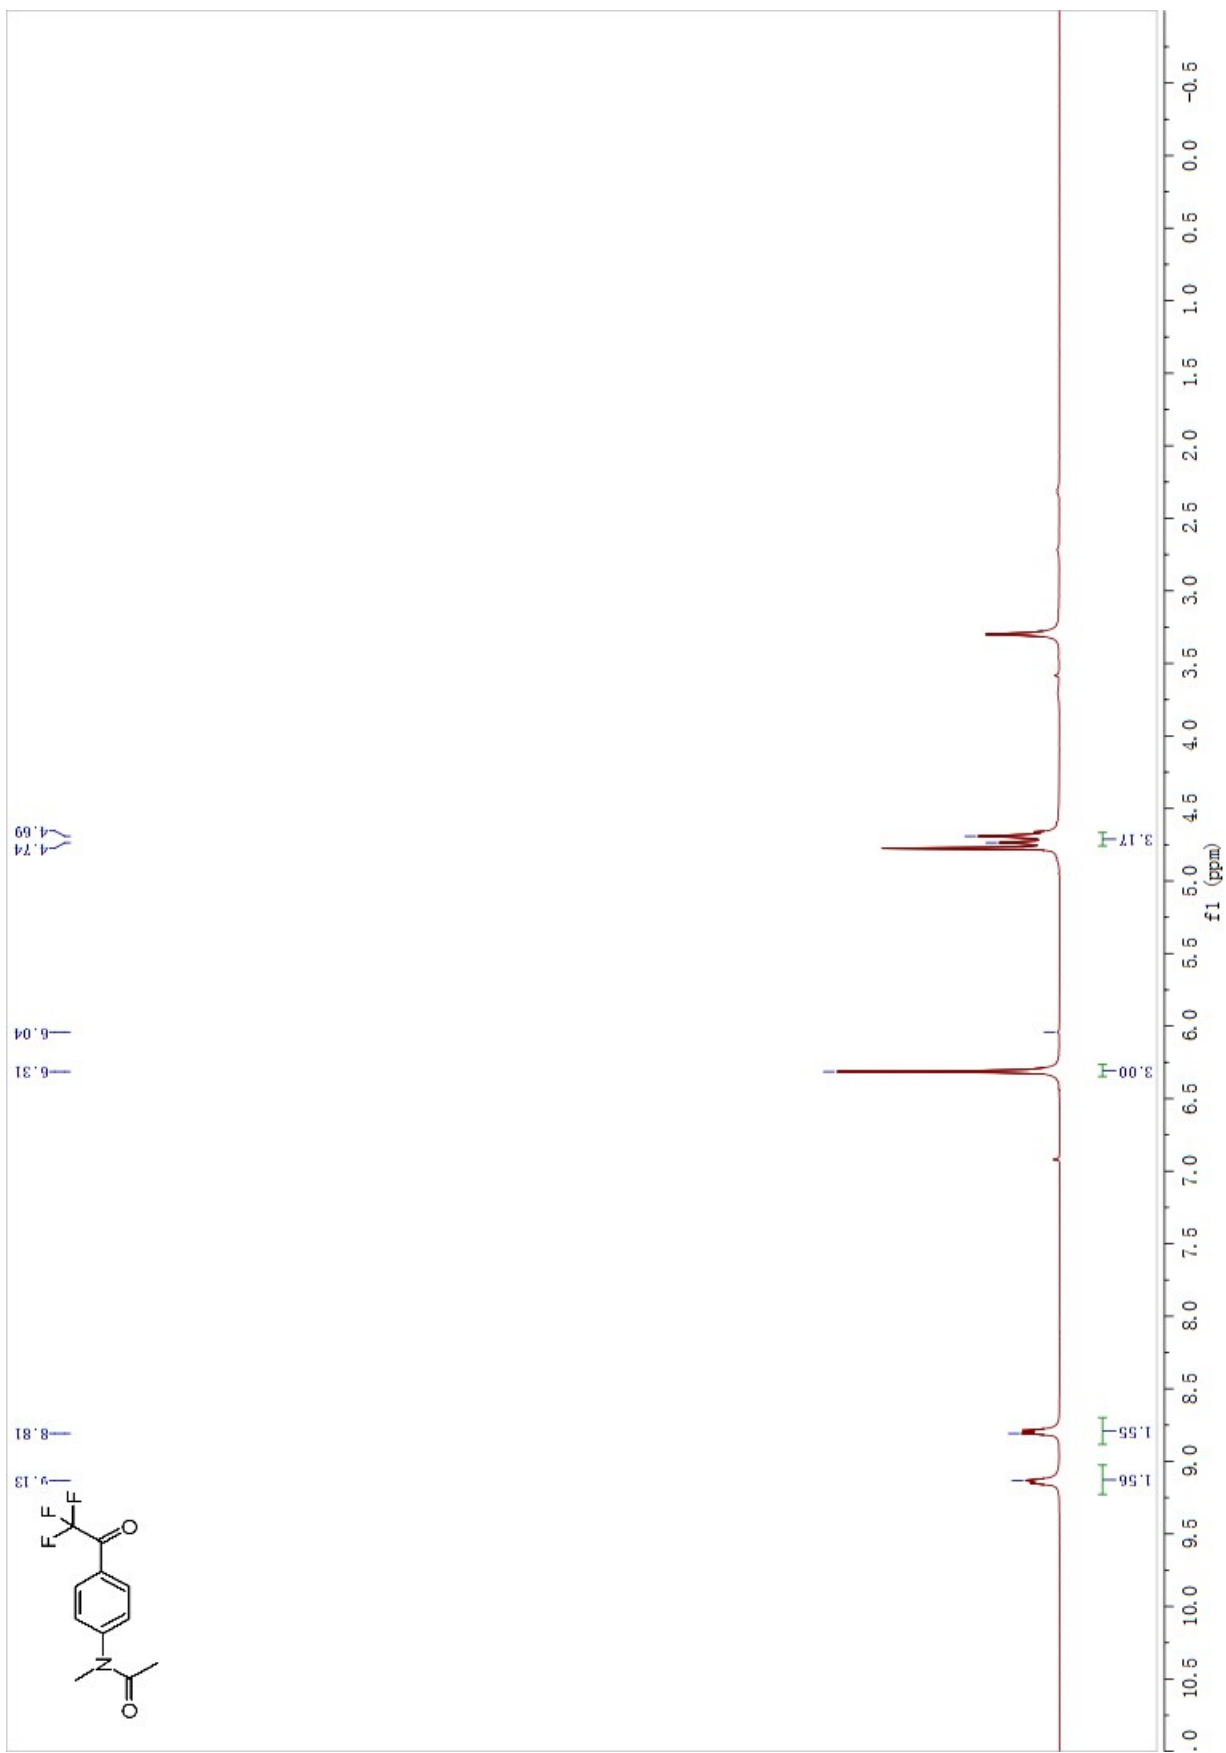

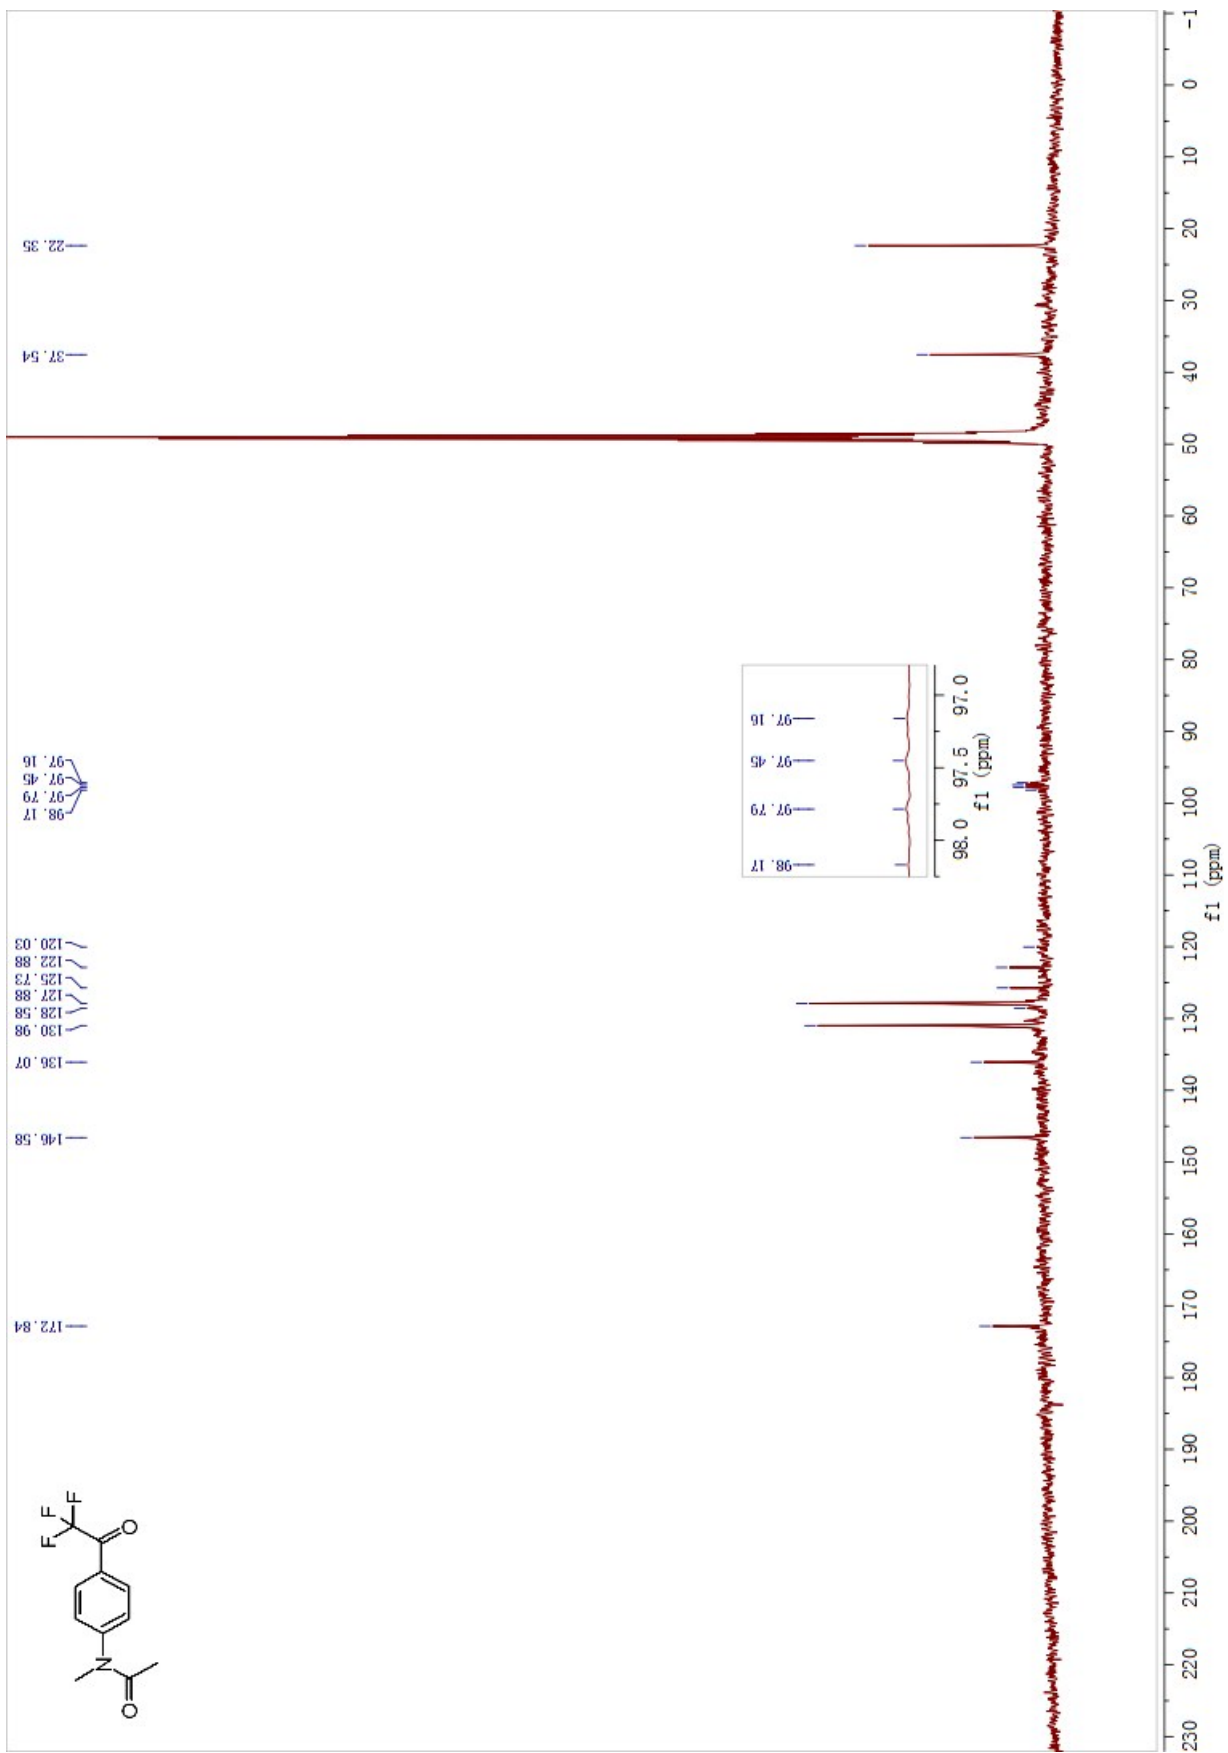



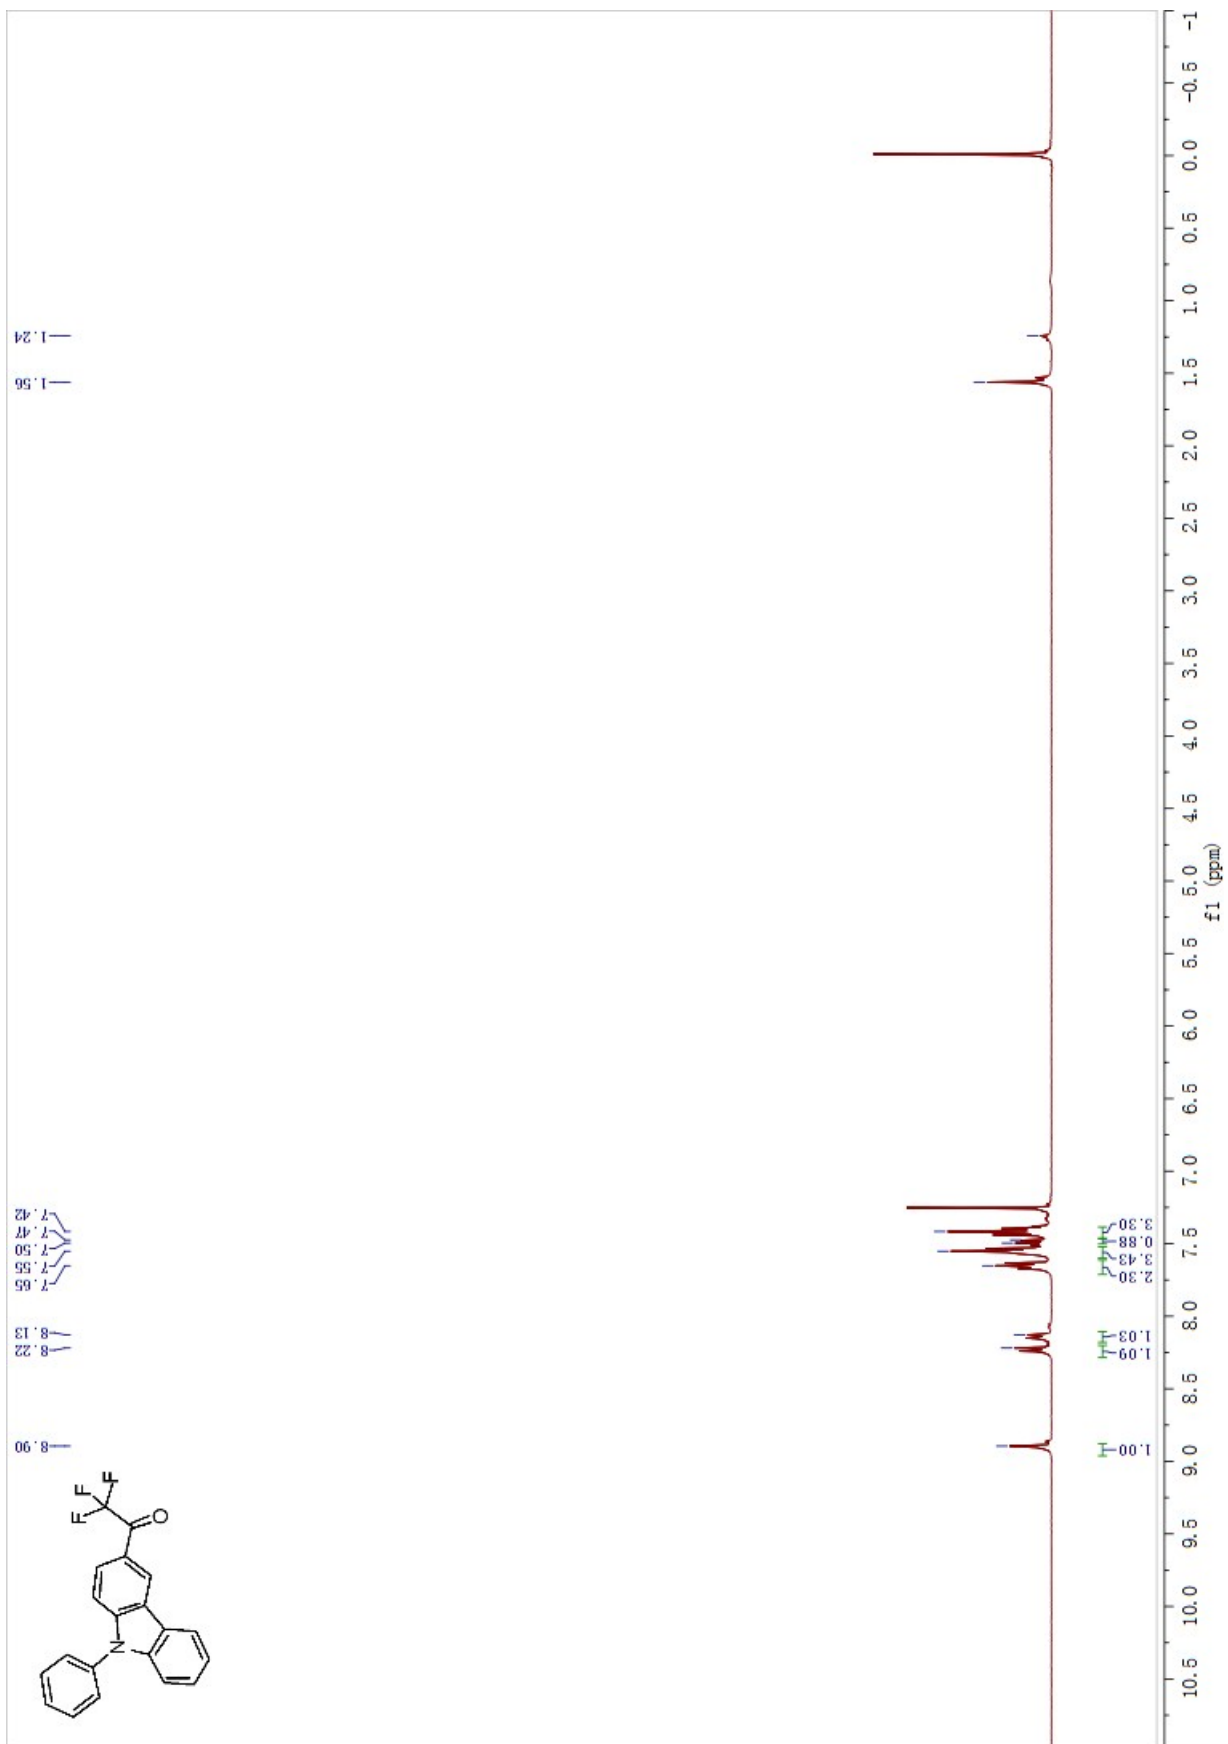

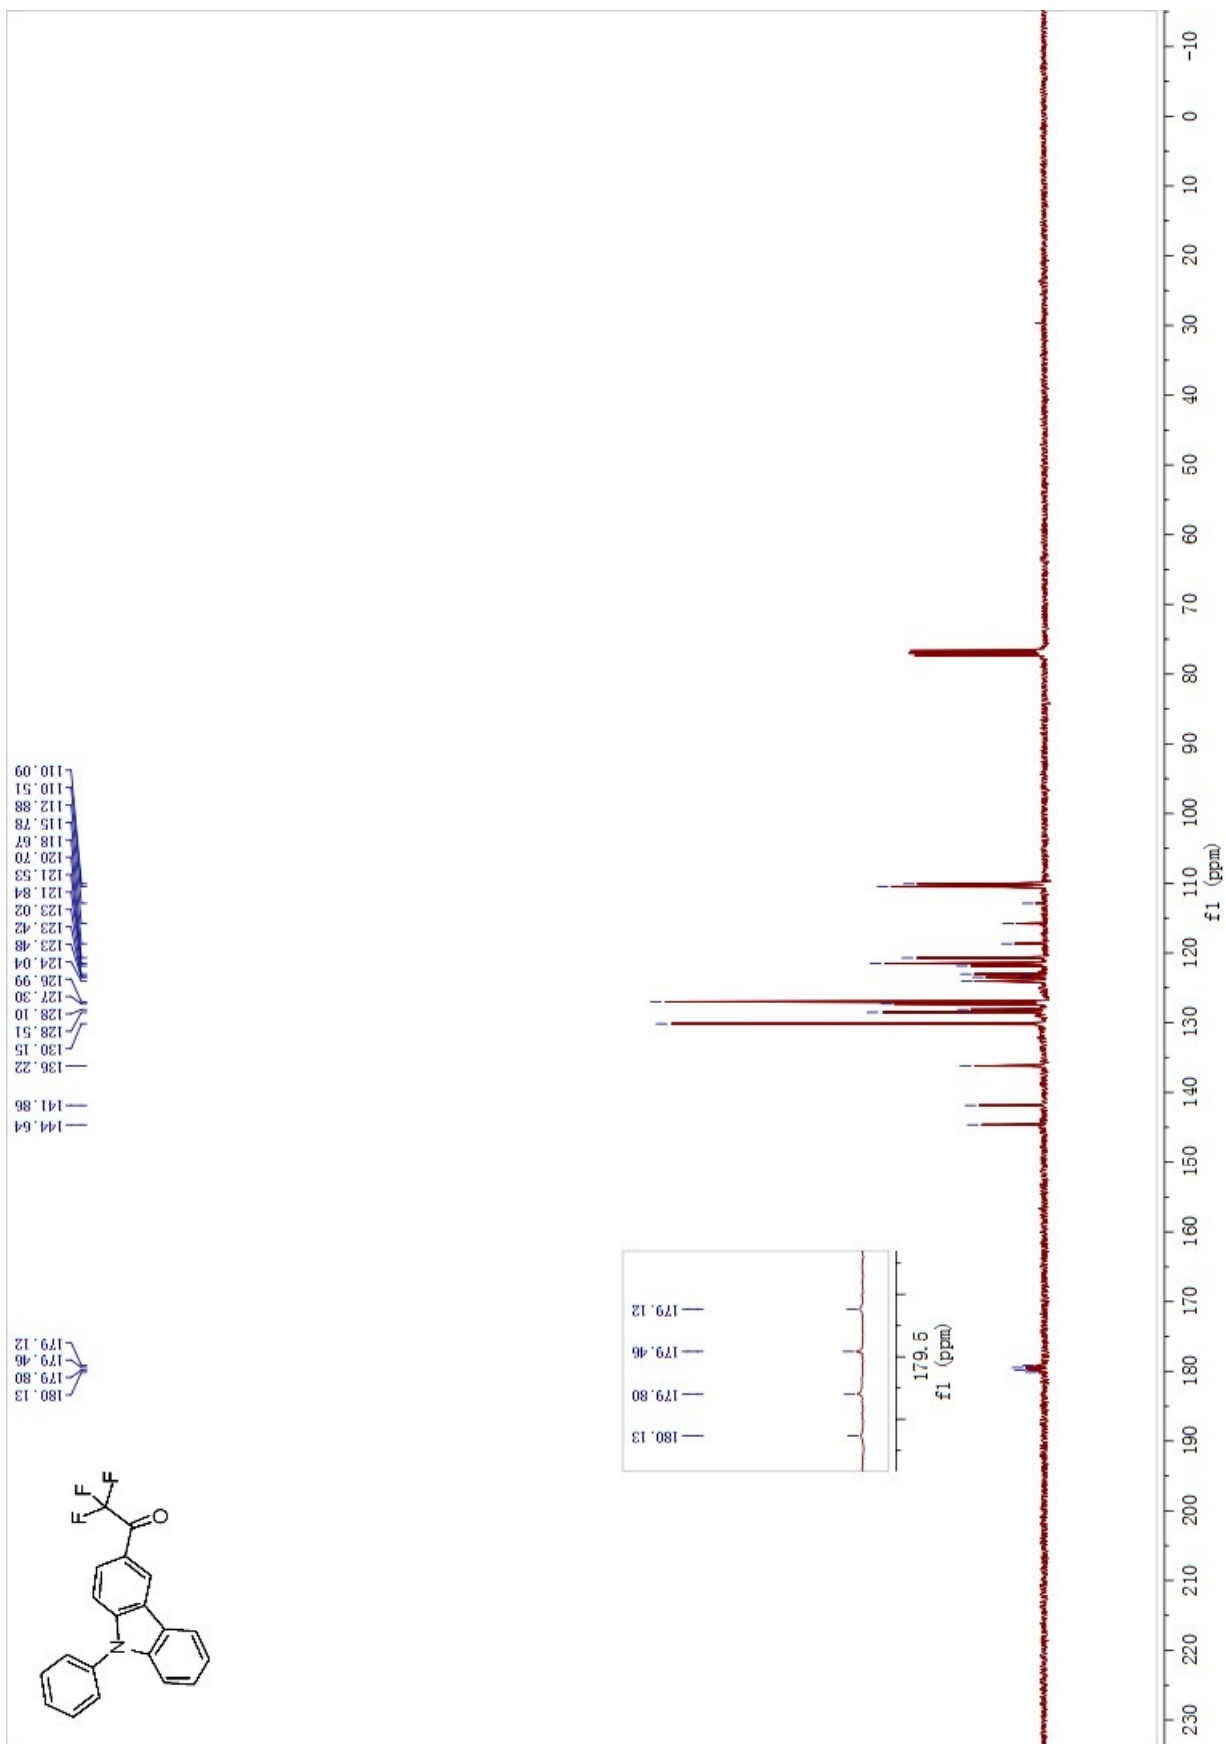

Supplement: c6ra12287f1.pdf [file c6ra12287f1.pdf]
